# Supplementary material
Source: publisher site journal article supplement (https://www.dovepress.com/article/279364)
Supplement: Supplementary file 1 [file get_supplementary_file.php]

**Supplementary Table 1.** Baseline demographics of patients enrolled in the treatment phase

| Parameter               | OTX-101 0.09%<br>N = 371 | Vehicle<br>N = 373 | Overall<br>N = 744 |
|-------------------------|--------------------------|--------------------|--------------------|
| <b>Age</b>              |                          |                    |                    |
| Mean (SD)               | 58.4 (14.101)            | 59.5 (14.687)      | 59.0 (14.0)        |
| min, max                | 18, 89                   | 20, 90             | 18, 90             |
| <b>Sex, n (%)</b>       |                          |                    |                    |
| Female                  | 315 (84.9)               | 311 (83.4)         | 626 (84.1)         |
| Male                    | 56 (15.1)                | 62 (16.6)          | 118 (15.9)         |
| <b>Race, n (%)</b>      |                          |                    |                    |
| White                   | 310 (83.6)               | 305 (81.8)         | 615 (82.7)         |
| Black                   | 41 (11.1)                | 45 (12.1)          | 86 (11.6)          |
| Asian                   | 11 (3.0)                 | 12 (3.2)           | 23 (3.1)           |
| Other                   | 9 (2.4)                  | 11 (3.0)           | 20 (2.7)           |
| <b>Ethnicity, n (%)</b> |                          |                    |                    |
| Not Hispanic/Latino     | 314 (84.6)               | 319 (85.5)         | 633 (85.1)         |
| Hispanic/Latino         | 57 (15.4)                | 54 (14.5)          | 111 (14.9)         |

**Notes:** Intent-to-treat population. Reprinted from *Ophthalmology*. 126(9), Goldberg DF, Malhotra RP, Schechter BA, Justice A, Weiss SL, Sheppard JD. A Phase 3, Randomized, Double-Masked Study of OTX-101 Ophthalmic Solution 0.09% in the Treatment of Dry Eye Disease. 1230-1237, Copyright (2019), with permission from Elsevier.<sup>1</sup>

**Abbreviations:** max, maximum; min, minimum; SD, standard deviation.

**Supplemental Table 2.** Snellen visual acuity and intraocular pressure during the long-term safety phase

|                                       | Prior OTX-101 <sup>a</sup><br>n = 129 |               |               | Prior vehicle <sup>a</sup><br>n = 129 |               |               | Overall<br>N = 258 |               |               |
|---------------------------------------|---------------------------------------|---------------|---------------|---------------------------------------|---------------|---------------|--------------------|---------------|---------------|
|                                       | n                                     | OS            | OD            | n                                     | OS            | OD            | n                  | OS            | OD            |
| <b>Snellen VA (logMAR equivalent)</b> |                                       |               |               |                                       |               |               |                    |               |               |
| Baseline <sup>b</sup>                 | 129                                   | 0.061 (0.101) | 0.065 (0.107) | 129                                   | 0.065 (0.098) | 0.066 (0.088) | 258                | 0.063 (0.099) | 0.065 (0.098) |
| Week 26                               | 116                                   | 0.061 (0.098) | 0.064 (0.121) | 111                                   | 0.064 (0.086) | 0.060 (0.081) | 227                | 0.062 (0.092) | 0.062 (0.103) |
| Week 39                               | 115                                   | 0.063 (0.096) | 0.065 (0.107) | 107                                   | 0.060 (0.077) | 0.061 (0.080) | 222                | 0.062 (0.087) | 0.063 (0.095) |
| Week 52                               | 111                                   | 0.065 (0.097) | 0.070 (0.100) | 105                                   | 0.060 (0.095) | 0.059 (0.090) | 216                | 0.063 (0.096) | 0.065 (0.095) |
| Week 64                               | 2                                     | 0.048 (0.069) | 0.048 (0.069) | 30                                    | 0.070 (0.074) | 0.059 (0.083) | 32                 | 0.068 (0.073) | 0.058 (0.081) |
| Early discontinuation                 | 11                                    | 0.044 (0.051) | 0.070 (0.098) | 27                                    | 0.057 (0.095) | 0.054 (0.075) | 38                 | 0.053 (0.084) | 0.058 (0.081) |
| <b>IOP, mmHg</b>                      |                                       |               |               |                                       |               |               |                    |               |               |
| Baseline <sup>b</sup>                 | 129                                   | 15.1 (2.6)    | 14.8 (2.5)    | 129                                   | 15.1 (2.7)    | 14.9 (2.7)    | 258                | 15.1 (2.6)    | 14.9 (2.6)    |
| Week 26                               | 116                                   | 15.4 (3.0)    | 15.3 (3.1)    | 111                                   | 15.5 (2.5)    | 15.4 (2.6)    | 227                | 15.5 (2.7)    | 15.4 (2.9)    |
| Week 39                               | 115                                   | 15.2 (2.9)    | 15.1 (3.0)    | 107                                   | 15.2 (2.6)    | 15.3 (2.8)    | 222                | 15.2 (2.8)    | 15.2 (2.9)    |
| Week 52                               | 111                                   | 15.1 (2.9)    | 15.0 (2.9)    | 105                                   | 15.4 (2.6)    | 15.3 (2.7)    | 216                | 15.2 (2.7)    | 15.1 (2.8)    |
| Week 64                               | 2                                     | 15.0 (4.2)    | 15.0 (4.2)    | 30                                    | 16.5 (2.4)    | 16.4 (2.5)    | 32                 | 16.4 (2.5)    | 16.3 (2.6)    |
| Early discontinuation                 | 10                                    | 14.6 (3.0)    | 13.2 (1.9)    | 27                                    | 15.1 (2.9)    | 15.0 (2.7)    | 37                 | 14.9 (2.9)    | 14.5 (2.6)    |

**Notes:** <sup>a</sup>During the treatment phase, patients administered 1 drop in each eye twice daily of OTX-101 0.09% or vehicle. All patients administered 1 drop of OTX-101 0.09% in each eye twice daily during the long-term safety phase. <sup>b</sup>Baseline refers to treatment phase baseline (week 0) for prior OTX-101 and to the week 12 visit for prior vehicle. Data presented for the safety population as mean (SD).

**Abbreviations:** IOP, intraocular pressure; logMAR, logarithm of the minimum angle of resolution; OD, right eye; OS, left eye; SD, standard deviation; VA, visual acuity.

**Supplemental Figure 1.** Patient disposition of the treatment phase

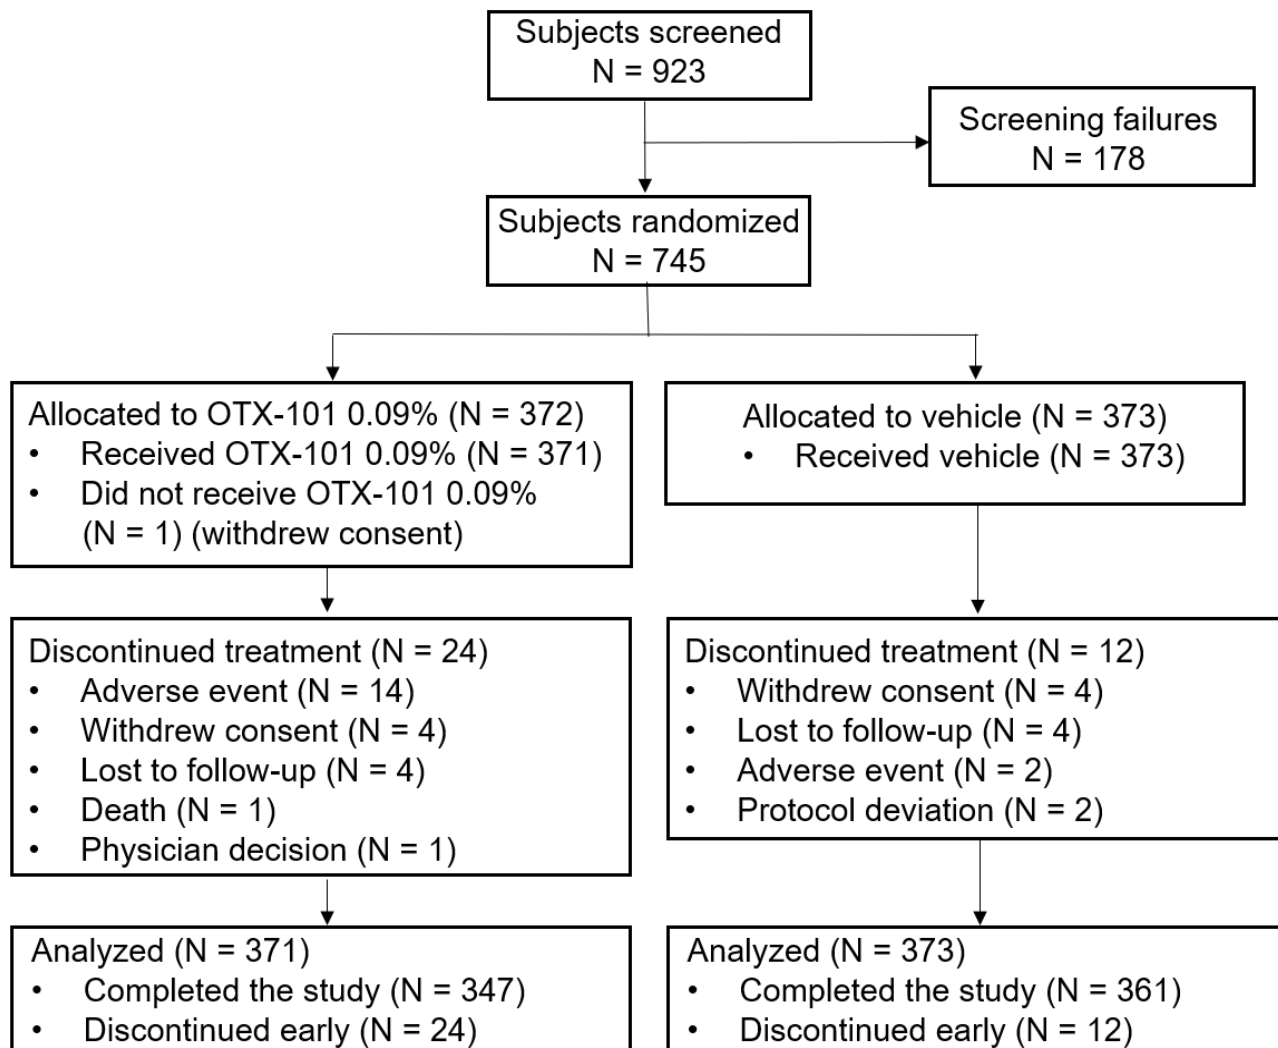

**Notes:** One patient randomized to OTX-101 0.09% who withdrew consent prior to receiving any study medication was excluded from the analysis. One patient randomized to vehicle inadvertently received OTX-101 0.09% and was included in the vehicle group for the purpose of efficacy analysis. Reprinted from *Ophthalmology*. 126(9), Goldberg DF, Malhotra RP, Schechter BA, Justice A, Weiss SL, Sheppard JD. A Phase 3, Randomized, Double-Masked Study of OTX-101 Ophthalmic Solution 0.09% in the Treatment of Dry Eye Disease. 1230-1237, Copyright (2019), with permission from Elsevier.<sup>1</sup>

## Reference

1. Goldberg DF, Malhotra RP, Schechter BA, Justice A, Weiss SL, Sheppard JD. A Phase 3, Randomized, Double-Masked Study of OTX-101 Ophthalmic Solution 0.09% in the Treatment of Dry Eye Disease. *Ophthalmology*. 2019;126(9):1230-1237.
